# Supplementary material for: An unexpected chlorination of an organic sunscreen
Source: Royal Society of Chemistry journal article supplement (doi:10.1039/d5cc01593f), 2025-01-01
Supplement: d5cc01593f1.zip [file d5cc01593f1.zip]

On a computer (not tablet or mobile phone) with a web browser and internet access, double click on the html file to open it. It will display the molecular structure with colour coded discs representing CHx groups (x = 0, 1, 2, or 3) overlayed on it. COSY correlations between the CHx groups are shown in pale blue. If you hover the mouse pointer over a disc it will display the HMBC correlations involving that disc and also display the carbon and proton shift(s) (as appropriate) for that disc. By hovering the mouse pointer over successive discs it is relatively easy to confirm that the observed correlations are consistent with the postulated structure and assignment.
